# Supplementary material for: Distinct tissue-specific requirements for the zebrafish tbx5 genes during heart, retina and pectoral fin development
Source: PubMed Central journal article supplement (PMC4043114; doi:10.1098/rsob.140014), 2014-04-23
Supplement: rsob140014supp1.pdf [file rsob140014supp1.pdf]

**1 ELECTRONIC SUPPLEMENTARY MATERIAL FIGURE LEGENDS**

2

**3 Supplementary Figure S1. Functionality and efficiency of the MOs used.**

4 **(a-a')** EGFP expression is observed after injection of 100 pg of *tbx5a-EGFP* mRNA into  
5 1-cell stage embryos. **(b-b')** Co-injection with *tbx5a* MO caused the disappearance of  
6 EGFP signal. **(c-c')** Injection of 100 pg of *tbx5b-EGFP* mRNA caused detectable  
7 expression of EGFP in 24hpf embryos. **(d-d')** Chimeric *tbx5b* mRNA-driven EGFP  
8 expression is abolished by co-injection with the *tbx5b(UTR)* MO. **(e)** RT-PCR from RNA  
9 extracted from injected embryos with a *control* MO or a *tbx5b(SP)* MO showing the  
10 expected 215 bp (spliced) band in control embryos in comparison to the 791bp  
11 (unspliced) bands in *tbx5b(SP)* MO injected embryos.

12

**13 Supplementary Figure S2. *efnb2a* expression analyses.**

14 **(a)** Quantification of the total extent of *efnb2a* expression by setting an imaginary hinge  
15 in the centre of the lens. **(b)** Dorso-nasal and **(c)** dorso-temporal angles measured by  
16 setting the dorsal-most point as the point lying dorsal to the ventrally-located choroid  
17 fissure. A Kruskal-Wallis test was used to determine statistical differences among  
18 experimental conditions (\*P<0.05, \*\*P<0.001).

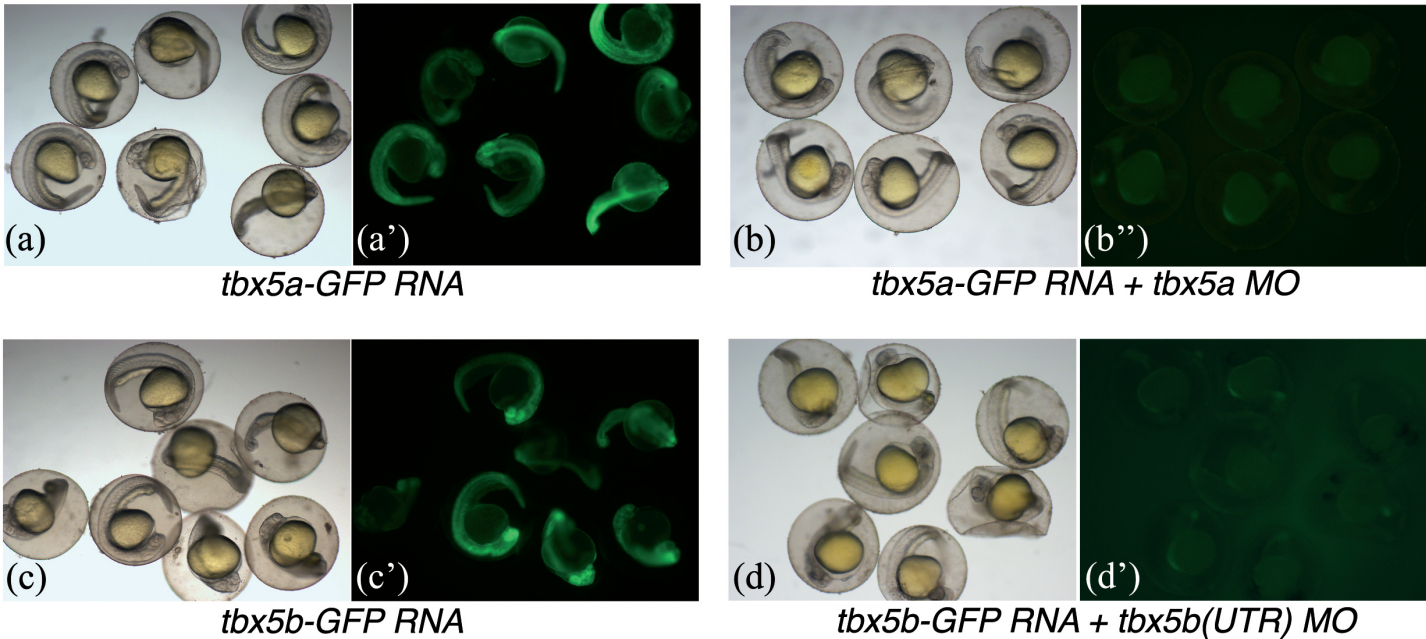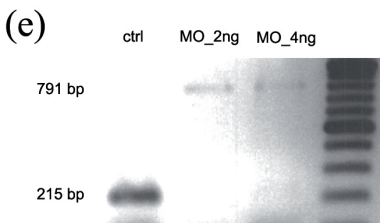

Pi-Roig, electronic supplementary material Figure S1

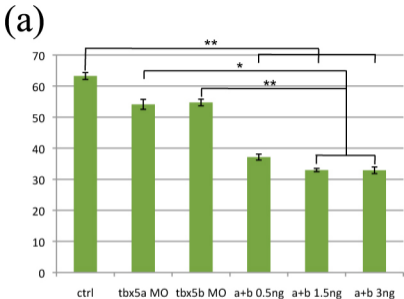

*efnb2a* total

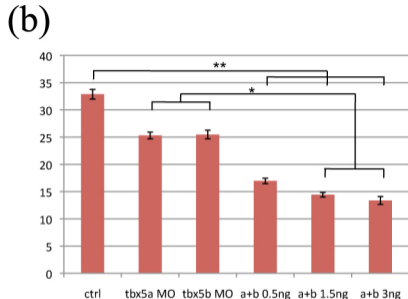

*efnb2a* nasal

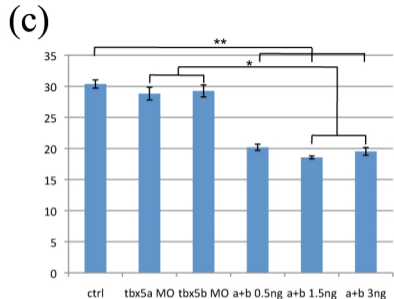

*efnb2a* temporal

Pi-Roig, electronic supplementary material Figure S2
